# Supplementary material for: Cardiomyocyte proliferation is suppressed by ARID1A-mediated YAP inhibition during cardiac maturation
Source: PubMed Central journal article supplement (PMC10404286; doi:10.1038/s41467-023-40203-2), 2023-08-05
Supplement: 41467_2023_40203_MOESM2_ESM.pdf [file 41467_2023_40203_MOESM2_ESM.pdf]

## **Description of Additional Supplementary Files**

File Name: Supplementary Data 1

Description: Functional annotation of differentially expressed genes, and differential H3K27Ac ChIP-Seq peaks

File Name: Supplementary Data 2

Description: Peak to gene annotation of differential H3K27Ac ChIP-Seq peaks

File Name: Supplementary Data 3

Description: Transcription factor motif occurrences in differential H3K27Ac ChIP-Seq peaks
